# Supplementary material
Source: PubMed Central journal article supplement (PMC1308932)
Supplement: pnas_0509082102_1.pdf [file pnas_0509082102_1.pdf]

**A**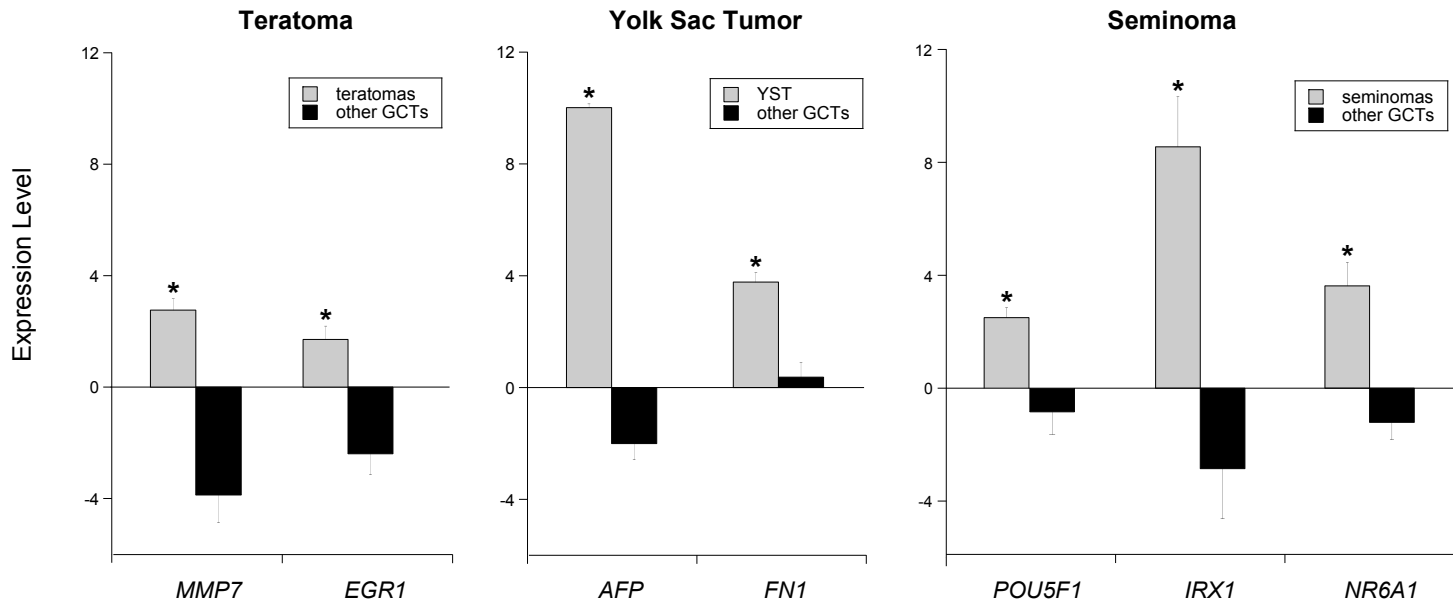**B**

| Name          | GenBank     | Forward                | Reverse               |
|---------------|-------------|------------------------|-----------------------|
| <i>MMP7</i>   | NM_002423.2 | GAGTGCCAGATGTTGCAGAA   | AAATGCAGGGGGATCTCTTT  |
| <i>EGR1</i>   | NM_001964.2 | CCTGACCGCAGAGTCTTTTC   | CTGGGGTAACTGGTCTCCAC  |
| <i>AFP</i>    | NM_001134.1 | ACAAACTATTGGCCTGTGGC   | CCAACACCAGGGTTTACTGG  |
| <i>FN1</i>    | NM_002026.2 | GAAGAGCGAGCCCCTGAT     | GGGTCTTTTGAAGTGTGA    |
| <i>POU5F1</i> | NM_002701.1 | GAACAGGGAATGGGTGAATG   | TCGGGATTCAAGAACCTACG  |
| <i>IRX1</i>   | NM_024337.3 | CAACTACAGCGCCTTCCTG    | CCAGGGTTGTCCTTCAGTTC  |
| <i>NR6A1</i>  | NM_001489.3 | TGATGTGCTTACCTGAGATTCG | AGGAATGCAGCACCACCTTA  |
| <i>GAPD</i>   | NM_002046.2 | TGCACCACCAACTGCTTAGC   | GGCATGGACTGTGGTCATGAG |
