# Supplementary material
Source: PubMed Central journal article supplement (PMC1308932)

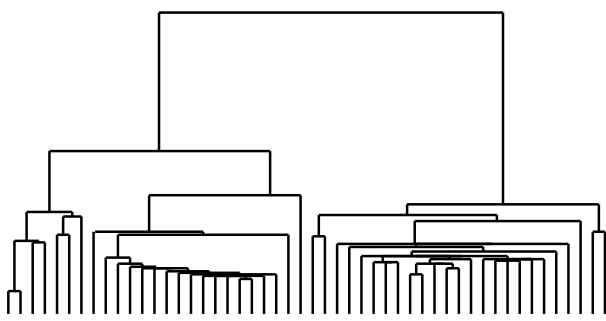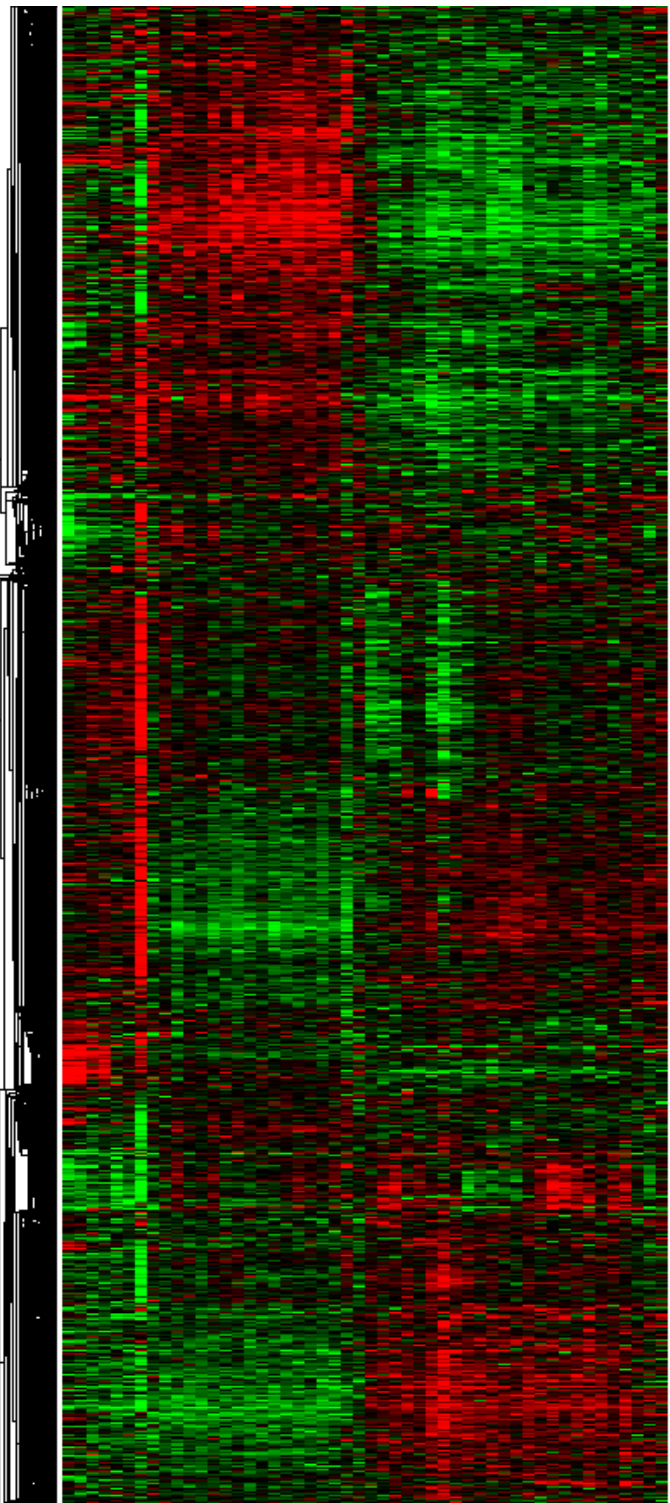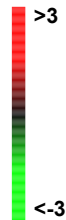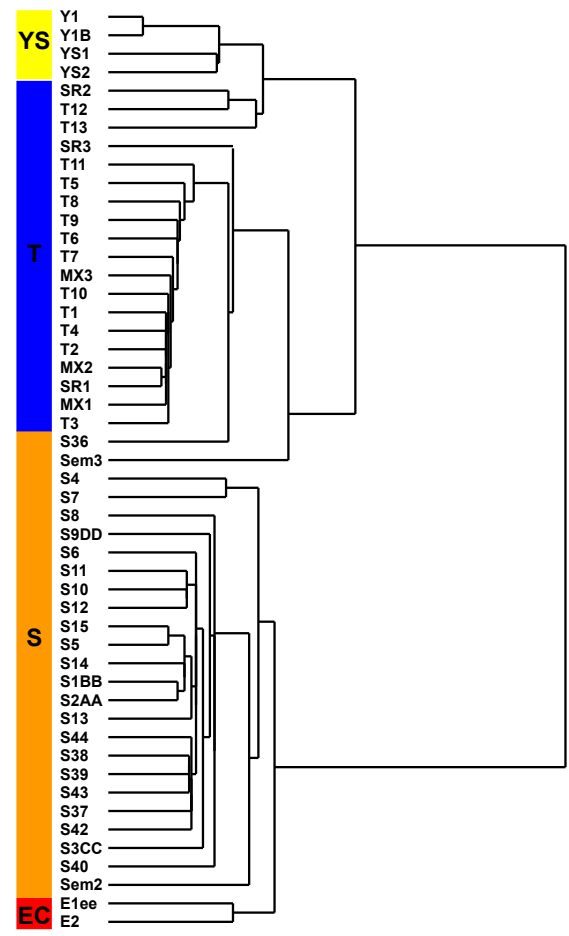

Supplement: pnas_0509082102_2.pdf [file pnas_0509082102_2.pdf]
